# Supplementary material
Source: Springer Nature journal article supplement (https://www.springermedizin.de/resource/supplementary/12895_2013_168_MOESM3_ESM.pdf/9514256)

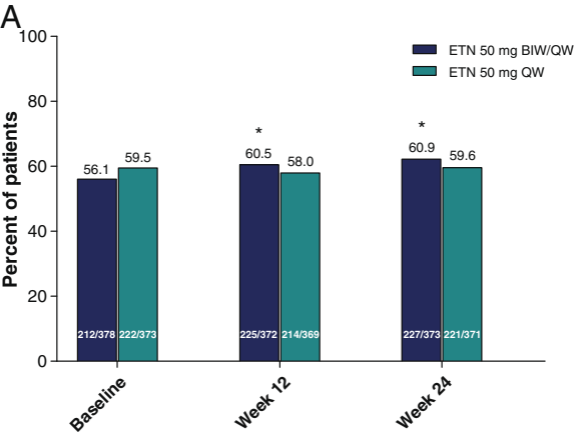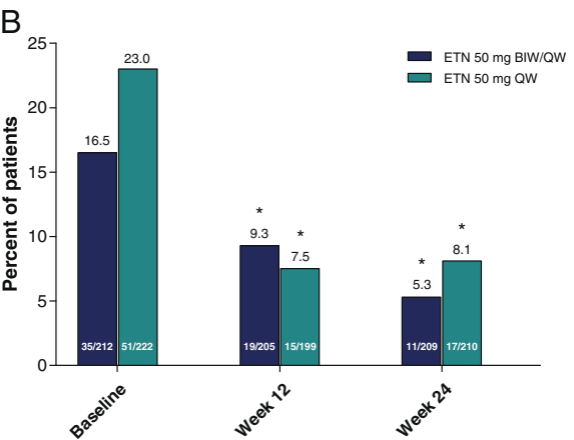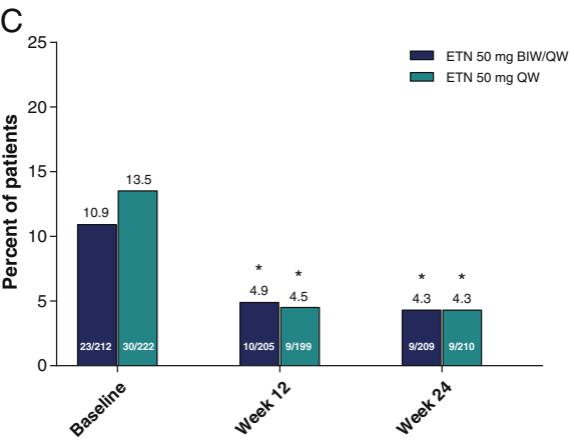

Supplement: MOESM3 [file 9514256]
